# Supplementary material for: Un oasis en la llanura vallisoletana: Riberas de Castronuño-Vega del Duero
Source: PLOS journal article supplement (doi:10.1371/journal.pone.0130821), 2009-01-01
Supplement: S2 (10.1371/journal.pone.0130821.s002) [file journal.pone.0130821.s002]

# NGA50 and NG50 for SOAPdenovo and MaSuRCA

In Table 1 and Table 2 are the NGA50 and NG50 for both SOAPdenovo and MaSuRCA assemblies.

**Table 1.** The assembled NGA50 contig size (in kilo-bases) for SOAPdenovo and MaSuRCA assemblies. The “-d0” and “-d1” are parameters to SOAPdenovo instructing the assemblers to use all 31-mers or to ignore the 31-mers occurring only once.

| Corrector | Rhodobacter |            | Staphylococcus |           |           |            | Mouse C16  |            |            | R. SRX264781 |           |            |
|-----------|-------------|------------|----------------|-----------|-----------|------------|------------|------------|------------|--------------|-----------|------------|
|           | SOAPdenovo  |            | SOAPdenovo     |           | MaSuRCA   | SOAPdenovo |            | MaSuRCA    | SOAPdenovo |              | MaSuRCA   |            |
|           | -d0         | -d1        | -d0            | -d1       |           | -d0        | -d1        |            | -d0        | -d1          |           |            |
| none      | 0.          | 2.7        | 0.             | 0.        | 4.8       | 0.         | 0.64       | 1.5        | 2.7        | 0.           | 15        | 0.         |
| Coral     | 0.          | 3.4        | 0.             | 0.67      | <b>16</b> | 2.1        | -          | -          | -          | 0.           | <b>29</b> | 0.         |
| Echo      | 0.          | 3.1        | 0.             | 0.92      | 9.1       | 1.2        | -          | -          | -          | 1.1          | 22        | 0.         |
| HiTec     | 0.96        | 2.3        | 0.             | 3.0       | 8.5       | 6.5        | -          | -          | -          | 2.4          | 13        | 60         |
| Quake     | 2.9         | 1.6        | 5.0            | 10        | 5.7       | 16         | <b>1.7</b> | <b>1.7</b> | <b>6.2</b> | 8.8          | 6.9       | 53         |
| SGA       | 3.4         | 2.3        | 3.4            | 8.4       | 5.9       | 10         | 1.4        | 1.4        | 5.2        | 20           | 15        | 61         |
| Racer     | 1.2         | 2.5        | 0.             | 5.2       | 7.8       | 4.2        | 1.2        | 1.2        | 6.0        | 4.5          | 15        | 52         |
| Musket    | 0.53        | 2.9        | 0.             | 2.1       | 9.5       | 0.         | 1.2        | 1.4        | 5.7        | 1.4          | 18        | 0.         |
| QuorUM    | <b>6.6</b>  | <b>5.9</b> | <b>19</b>      | <b>19</b> | 16        | <b>33</b>  | <b>1.7</b> | <b>1.7</b> | 5.7        | <b>26</b>    | 25        | <b>130</b> |

**Table 2.** The assembled NG50 contig size (in kilo-bases) for SOAPdenovo and MaSuRCA assemblies. The “-d0” and “-d1” are parameters to SOAPdenovo instructing the assemblers to use all 31-mers or to ignore the 31-mers occurring only once.

| Corrector | Rhodobacter |            | Staphylococcus |           |           |            | Mouse C16  |            |            | R. SRX264781 |           |            |
|-----------|-------------|------------|----------------|-----------|-----------|------------|------------|------------|------------|--------------|-----------|------------|
|           | SOAPdenovo  |            | SOAPdenovo     |           | MaSuRCA   | SOAPdenovo |            | MaSuRCA    | SOAPdenovo |              | MaSuRCA   |            |
|           | -d0         | -d1        | -d0            | -d1       |           | -d0        | -d1        |            | -d0        | -d1          |           |            |
| none      | 0.          | 2.7        | 0.             | 0.        | 4.8       | 0.         | 0.64       | 1.5        | 2.7        | 0.           | 16        | 0.         |
| Coral     | 0.          | 3.4        | 0.             | 0.67      | <b>17</b> | 2.1        | -          | -          | -          | 0.           | <b>30</b> | 0.         |
| Echo      | 0.          | 3.1        | 0.             | 0.92      | 9.2       | 1.2        | -          | -          | -          | 1.1          | 22        | 0.         |
| HiTec     | 0.96        | 2.3        | 0.             | 3.0       | 8.5       | 6.5        | -          | -          | -          | 2.4          | 13        | 60         |
| Quake     | 2.9         | 1.6        | 5.0            | 10        | 5.7       | 17         | <b>1.7</b> | <b>1.7</b> | <b>6.2</b> | 8.8          | 6.9       | 54         |
| SGA       | 3.4         | 2.3        | 3.4            | 8.4       | 5.9       | 10         | 1.4        | 1.4        | 5.3        | 20           | 15        | 61         |
| Racer     | 1.2         | 2.5        | 0.             | 5.2       | 7.9       | 4.2        | 1.2        | 1.2        | 6.0        | 4.5          | 15        | 52         |
| Musket    | 0.53        | 2.9        | 0.             | 2.1       | 9.5       | 0.         | 1.2        | 1.4        | 5.7        | 1.4          | 18        | 0.         |
| QuorUM    | <b>6.6</b>  | <b>5.9</b> | <b>19</b>      | <b>19</b> | 16        | <b>33</b>  | <b>1.7</b> | <b>1.7</b> | 5.8        | <b>26</b>    | 25        | <b>130</b> |
