# Supplementary material for: Un oasis en la llanura vallisoletana: Riberas de Castronuño-Vega del Duero
Source: PLOS journal article supplement (doi:10.1371/journal.pone.0130821), 2009-01-01
Supplement: S5 (10.1371/journal.pone.0130821.s005) [file journal.pone.0130821.s005]

## Robustness to choice of $k$

Tables 1 and 2 are equivalent to Table 1 in the main text, generated for a difference values for the length of the  $k$ -mers. The relative performance of QuorUM versus the other error corrector is identical for all these choice of  $k$ .

**Table 1. Percent of false 21-mers remaining and true 21-mers missing in error corrected reads.**

| Corrector | Rhodobacter         |                      |             | Staphylococcus      |                      |              | Mouse C16            |                     |             | R. SRX264781        |                      |             |
|-----------|---------------------|----------------------|-------------|---------------------|----------------------|--------------|----------------------|---------------------|-------------|---------------------|----------------------|-------------|
|           | False remain (51 M) | True missing (4.6 M) | Score $\pi$ | False remain (32 M) | True missing (2.9 M) | Score $\pi$  | False remain (360 M) | True missing (87 M) | Score $\pi$ | False remain (46 M) | True missing (4.6 M) | Score $\pi$ |
| none      | 100                 | 0.17                 | 20          | 100                 | 0.0097               | 1.0          | 100                  | 0.017               | 2           | 100                 | 0.11                 | 10          |
| trim20B   | 57                  | 0.17                 | 10          | 67                  | 0.017                | 1            | 51                   | <b>0.020</b>        | 1           | 67                  | 0.11                 | 7           |
| trimQual5 | 8.3                 | 0.29                 | 2           | 96                  | <b>0.010</b>         | 1.0          | 29                   | 0.034               | 1           | 19                  | 0.12                 | 2           |
| Coral     | 70                  | 0.18                 | 10          | 62                  | 0.050                | 3            | -                    | -                   | -           | 54                  | 0.18                 | 10          |
| Echo      | 60                  | <b>0.17</b>          | 10          | 57                  | 0.010                | 0.6          | -                    | -                   | -           | 40                  | <b>0.11</b>          | 4           |
| HiTec     | 40                  | 0.60                 | 20          | 37                  | 0.13                 | 5            | -                    | -                   | -           | 29                  | 0.15                 | 4           |
| Quake     | 7.2                 | 0.30                 | 2           | 2.9                 | 0.15                 | 0.4          | 2.9                  | 0.090               | 0.3         | 8.4                 | 0.12                 | 1           |
| SGA       | 1.4                 | 1.1                  | 1           | 0.31                | 0.48                 | 0.1          | 3.8                  | 0.087               | 0.3         | 0.38                | 0.16                 | 0.06        |
| Racer     | 39                  | 0.45                 | 20          | 40                  | 0.12                 | 5            | 29                   | 0.093               | 3           | 29                  | 0.15                 | 4           |
| Musket    | 43                  | 0.24                 | 10          | 49                  | 0.024                | 1            | 30                   | 0.046               | 1           | 41                  | 0.12                 | 5           |
| QuorUM    | <b>0.30</b>         | 0.23                 | <b>0.07</b> | <b>0.19</b>         | 0.038                | <b>0.007</b> | <b>1.1</b>           | 0.040               | <b>0.04</b> | <b>0.21</b>         | 0.12                 | <b>0.02</b> |

**Table 2. Percent of false 51-mers remaining and true 51-mers missing in error corrected reads.**

| Corrector | Rhodobacter         |                      |             | Staphylococcus      |                      |             | Mouse C16            |                     |             | R. SRX264781        |                      |             |
|-----------|---------------------|----------------------|-------------|---------------------|----------------------|-------------|----------------------|---------------------|-------------|---------------------|----------------------|-------------|
|           | False remain (50 M) | True missing (4.6 M) | Score $\pi$ | False remain (28 M) | True missing (2.9 M) | Score $\pi$ | False remain (410 M) | True missing (87 M) | Score $\pi$ | False remain (43 M) | True missing (4.6 M) | Score $\pi$ |
| none      | 100                 | 1.7                  | 200         | 100                 | 0.42                 | 40          | 100                  | 0.28                | 30          | 100                 | 0.32                 | 30          |
| trim20B   | 48                  | 2.1                  | 100         | 55                  | 1.4                  | 80          | 43                   | 0.35                | 10          | 55                  | 0.49                 | 30          |
| trimQual5 | 9.9                 | 3.7                  | 40          | 96                  | 0.44                 | 40          | 37                   | 0.38                | 10          | 19                  | 0.55                 | 10          |
| Coral     | 66                  | 1.5                  | 100         | 50                  | 0.42                 | 20          | -                    | -                   | -           | 43                  | 0.68                 | 30          |
| Echo      | 58                  | 1.4                  | 80          | 53                  | <b>0.20</b>          | 10          | -                    | -                   | -           | 36                  | 0.26                 | 9           |
| HiTec     | 44                  | 2.3                  | 100         | 31                  | 0.48                 | 10          | -                    | -                   | -           | 24                  | 0.36                 | 9           |
| Quake     | 9.1                 | 3.6                  | 30          | 3.8                 | 0.62                 | 2           | 6.2                  | 0.42                | 3           | 9.5                 | 0.51                 | 5           |
| SGA       | 3.8                 | 2.5                  | 9           | 0.92                | 0.97                 | 0.9         | 13                   | 0.37                | 5           | 0.85                | 0.34                 | 0.3         |
| Racer     | 42                  | 2.1                  | 90          | 32                  | 0.61                 | 20          | 35                   | 0.57                | 20          | 23                  | 0.40                 | 9           |
| Musket    | 37                  | 1.5                  | 60          | 38                  | 0.26                 | 10          | 29                   | 0.42                | 10          | 30                  | 0.31                 | 9           |
| QuorUM    | <b>0.33</b>         | <b>0.94</b>          | <b>0.3</b>  | <b>0.32</b>         | 0.24                 | <b>0.08</b> | <b>4.1</b>           | <b>0.30</b>         | <b>1</b>    | <b>0.33</b>         | <b>0.25</b>          | <b>0.08</b> |
